# Supplementary material
Source: PubMed Central journal article supplement (PMC4038577)
Supplement: JCI73579sd.pdf [file JCI73579sd.pdf]

Supplemental Figure S1

A.

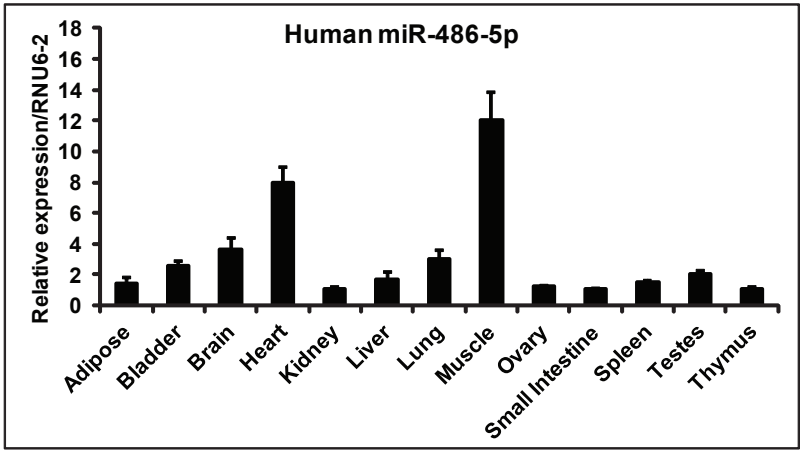

B.

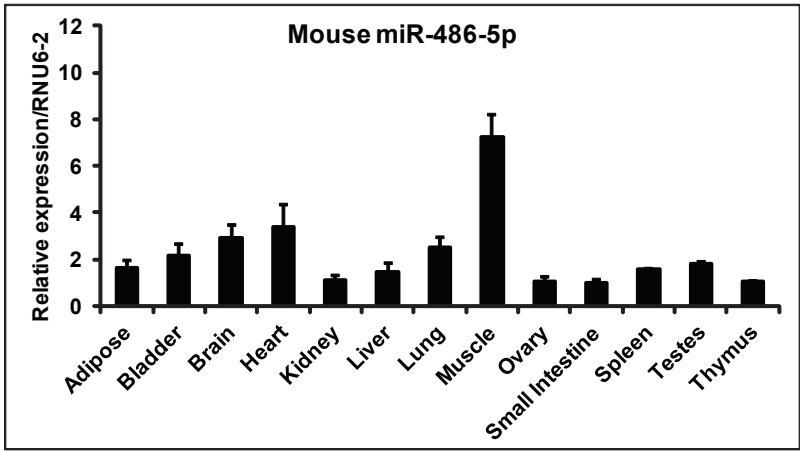

C.

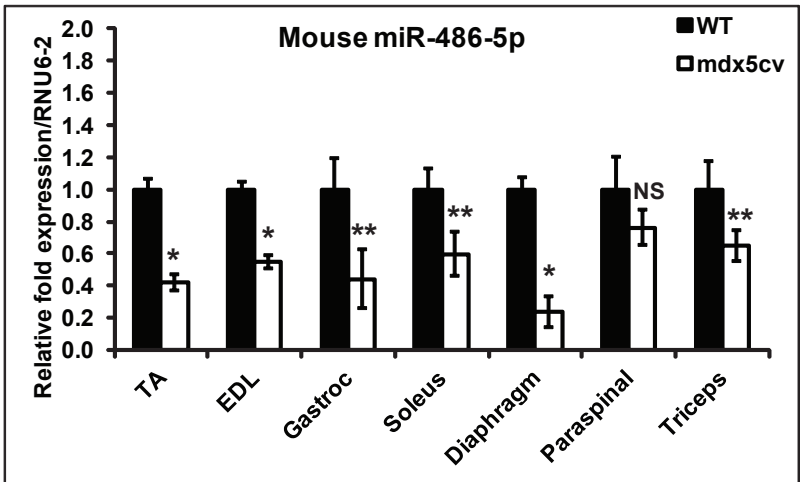

Supplemental Figure S1: MicroRNA-486 is a muscle-enriched microRNA whose expression is reduced in dystrophin-deficient muscle.

# Supplemental Figure S2

A.

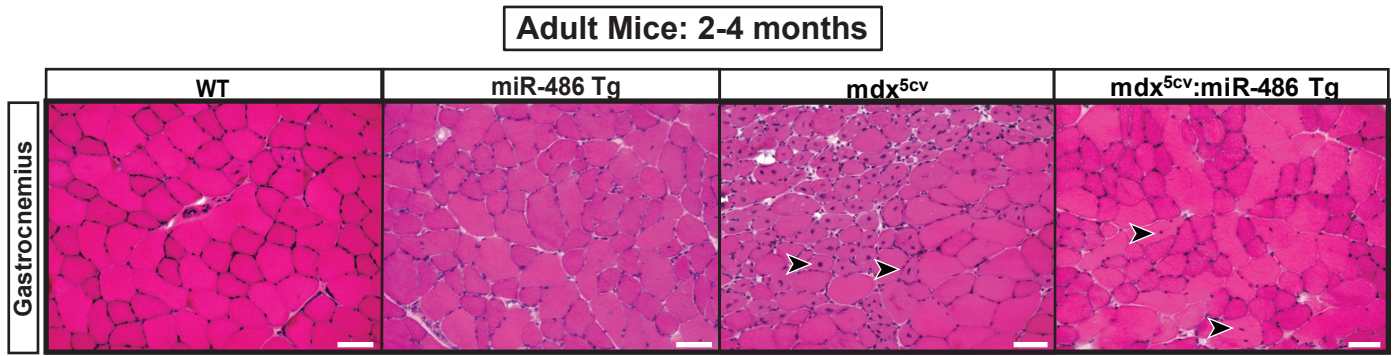

B.

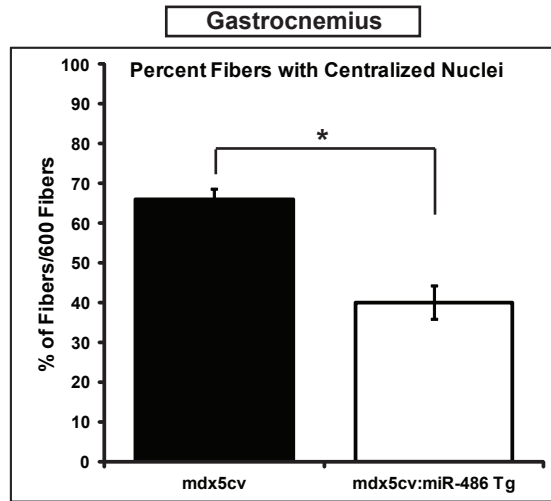

A.

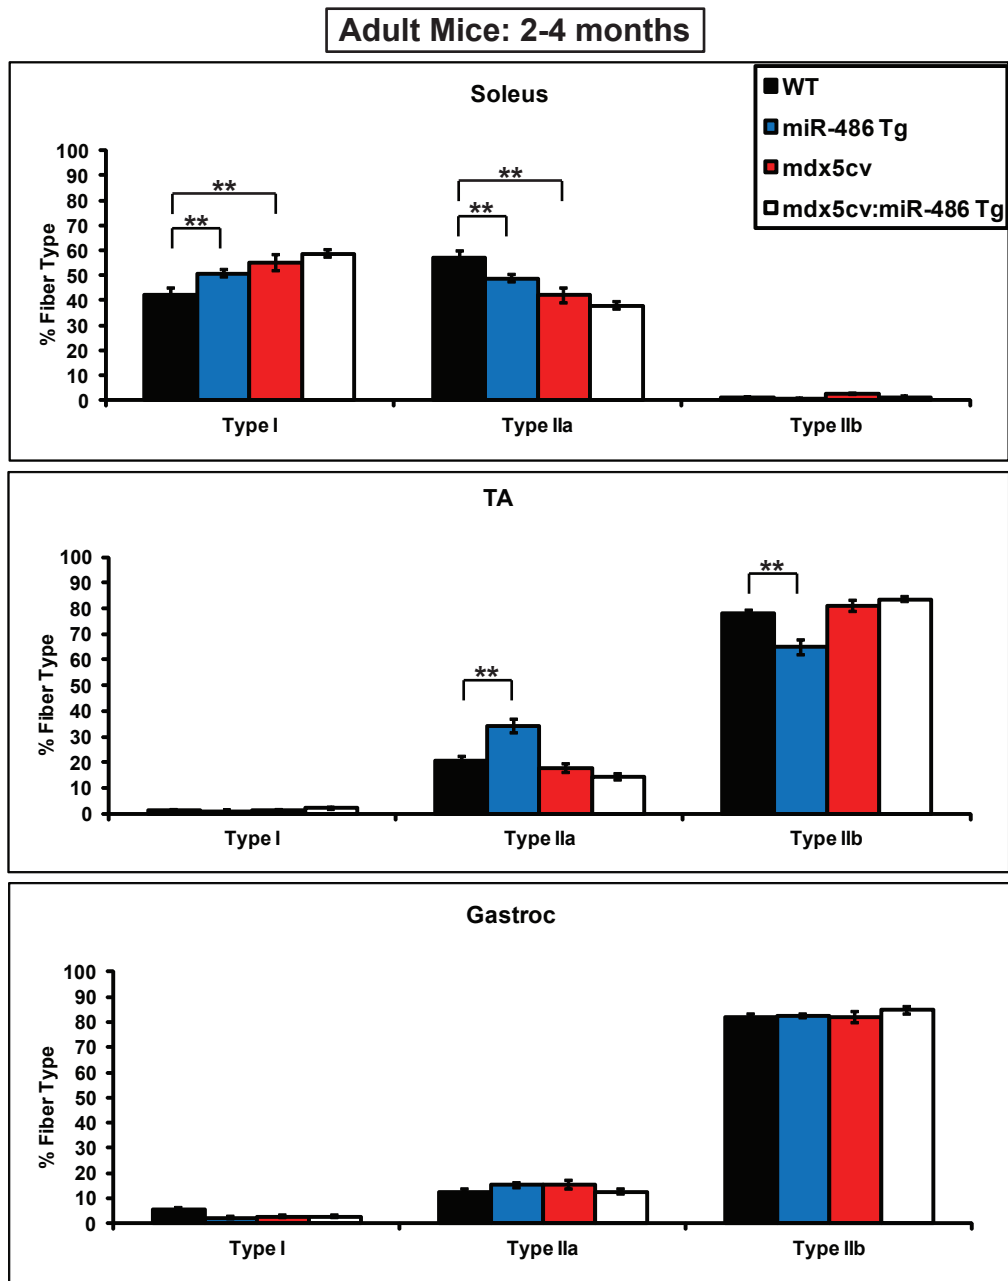

B.

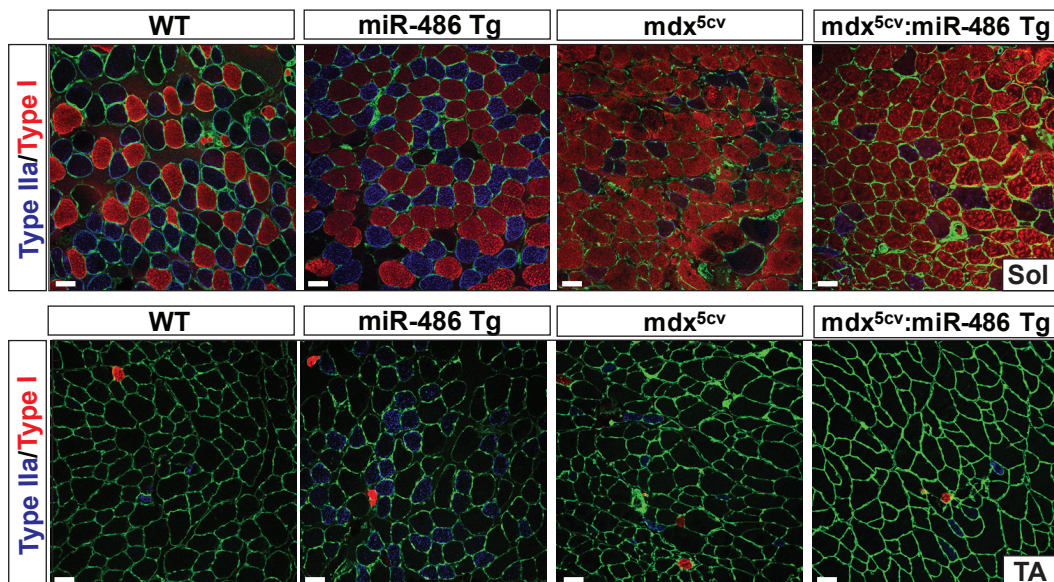

Supplemental Figure S3: Skeletal muscle fiber type is not significantly altered in miR-486 overexpressing mice.

Aged Mice: 10-14 months

A.

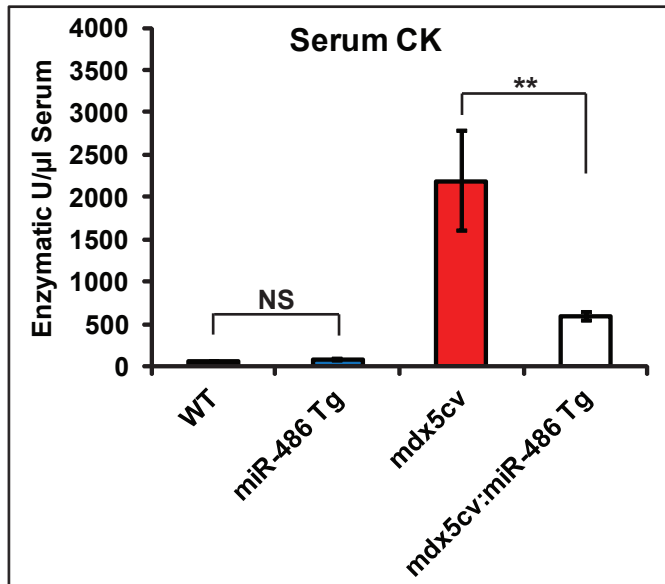

B.

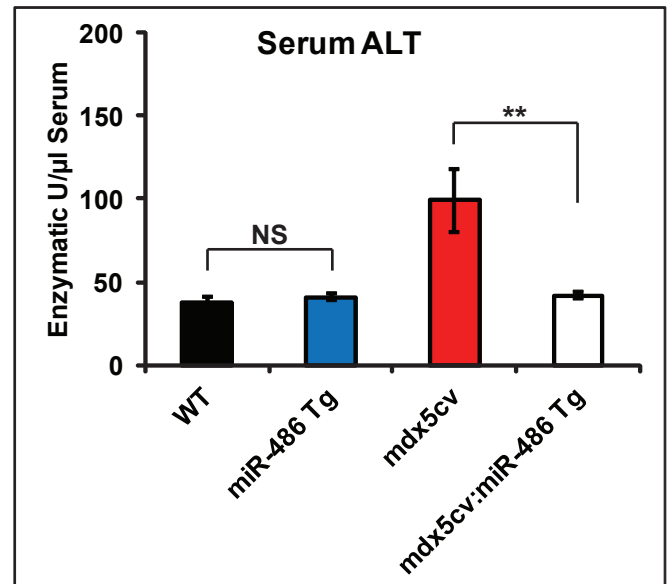

Supplemental Figure S4: Serum dystrophic biochemistries are improved in aged dystrophic mice.

Supplemental Figure S5

A.

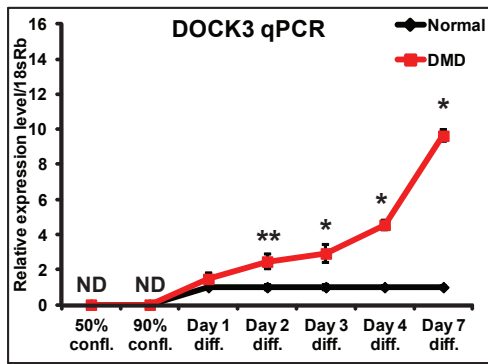

B.

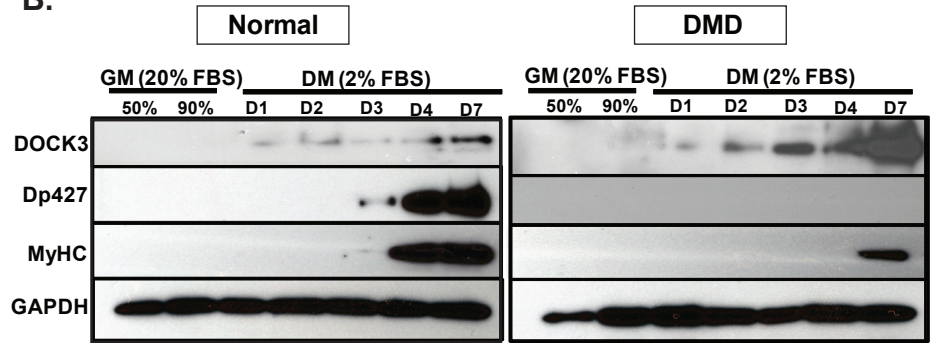

C.

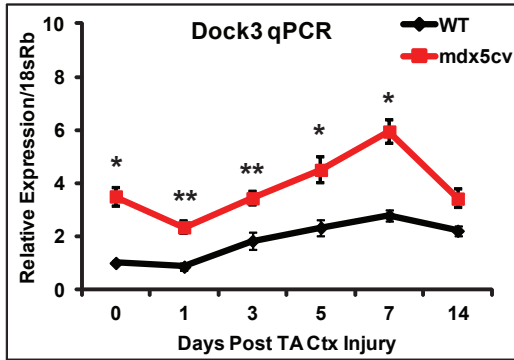

Supplemental Figure S5: DOCK3 expression increases during myogenic differentiation and is highly expressed in DMD myotubes.

Supplemental Figure S6

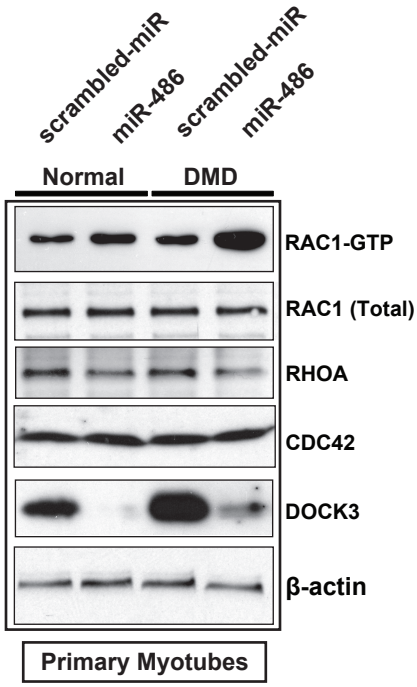

Supplemental Figure S6: Overexpression of miR-486 in dystrophic myotubes increases activated RAC1 expression levels.

## Primary Antisera

| <b>Antibody</b>             | <b>Company</b>             | <b>Species</b>    | <b>Use/Dilution</b> |
|-----------------------------|----------------------------|-------------------|---------------------|
| $\beta$ -tubulin-HRP        | Cell Signaling Technology  | Rabbit monoclonal | WB: 1:2000          |
| $\beta$ -actin (AC-15)      | Sigma-Aldrich              | Mouse monoclonal  | WB: 1:2000          |
| GAPDH (FL-335)              | Santa Cruz Biotechnologies | Rabbit polyclonal | WB: 1:5000          |
| PTEN                        | Cell Signaling Technology  | Rabbit monoclonal | WB: 1:1000          |
| phospho-AKT (S473)          | Cell Signaling Technology  | Rabbit monoclonal | WB: 1:1000          |
| phospho-AKT (T308)          | Cell Signaling Technology  | Rabbit monoclonal | WB: 1:1000          |
| AKT (pan) (C67E7)           | Cell Signaling Technology  | Rabbit monoclonal | WB: 1:1000          |
| AKT1                        | Cell Signaling Technology  | Rabbit monoclonal | WB: 1:1000          |
| AKT2                        | Cell Signaling Technology  | Rabbit monoclonal | WB: 1:1000          |
| AKT3                        | Cell Signaling Technology  | Rabbit monoclonal | WB: 1:1000          |
| DOCK3/MOCA (H-93)           | Santa Cruz Biotechnologies | Rabbit polyclonal | WB: 1:1000          |
| Hemagglutinin/HA            | Clontech Laboratories, Inc | Rabbit polyclonal | WB: 1:1000          |
| Cleaved Caspase-3 (5A1E)    | Cell Signaling Technology  | Rabbit monoclonal | WB: 1:1000          |
| Rac1                        | ThermoScientific           | Mouse monoclonal  | WB: 1:1000          |
| RhoA (67B9)                 | Cell Signaling Technology  | Rabbit monoclonal | WB: 1:1000          |
| Cdc42 (11A11)               | Cell Signaling Technology  | Rabbit monoclonal | WB: 1:1000          |
| Dystrophin (C-term)         | Abcam                      | Rabbit polyclonal | WB: 1:1000          |
| Myosin Heavy Chain          | Maine Biotechnology        | Mouse monoclonal  | WB: 1:1000          |
| Laminin $\alpha$ 2 (4H8-2)  | Sigma-Aldrich              | Rat monoclonal    | IF: 1:200           |
| Laminin (L9393)             | Sigma-Aldrich              | Rabbit polyclonal | IF: 1:200           |
| MF20 (myosin heavy chain)   | DSHB Iowa                  | Mouse monoclonal  | IF: 1:50            |
| BA-F8 (Type I, slow myosin) | DSHB Iowa                  | Mouse monoclonal  | IF: 1:200           |
| SC-71 (Type IIa myosin)     | DSHB Iowa                  | Mouse monoclonal  | IF: 1:50            |
| BF-F3 (Type IIb myosin)     | DSHB Iowa                  | Mouse monoclonal  | IF: 1:50            |

**Supplemental Table S2****Real Time qPCR Primers**

| <b>Primer Name</b>    | <b>Gene Symbol</b> | <b>Sequence 5' to 3'</b> | <b>Species</b> |
|-----------------------|--------------------|--------------------------|----------------|
| hDOCK3_qPCR_forward1  | DOCK3              | CAGGTGCGGGAGGTTAAGC      | Human          |
| hDOCK3_qPCR_reverse1  | DOCK3              | CTGAGACACTAATCTGGTCCGA   | Human          |
| h18sRib_qPCR_forward1 | 18sRib             | CCGATAACGAACGAGACTCTGG   | Human          |
| h18sRib_qPCR_reverse1 | 18sRib             | TAGGGTAGGCACACGCTGAGCC   | Human          |
| mDock3_qPCR_forward1  | Dock3              | AGAGGAGTTTCAACAAAGAAGCC  | Mouse          |
| mDock3_qPCR_reverse1  | Dock3              | CAGACTGGCCCACTCTTGTAG    | Mouse          |
| 18sRib_qPCR_forward1  | 18sRib             | CTCAACACGGGAAACCTCAC     | Mouse          |
| 18sRib_qPCR_reverse1  | 18sRib             | TGCCAGAGTCTCGTTCGTTAT    | Mouse          |
